# Supplementary material
Source: Springer Nature journal article supplement (https://www.springermedizin.de/resource/supplementary/13048_2010_51_MOESM1_ESM.pdf/9664790)

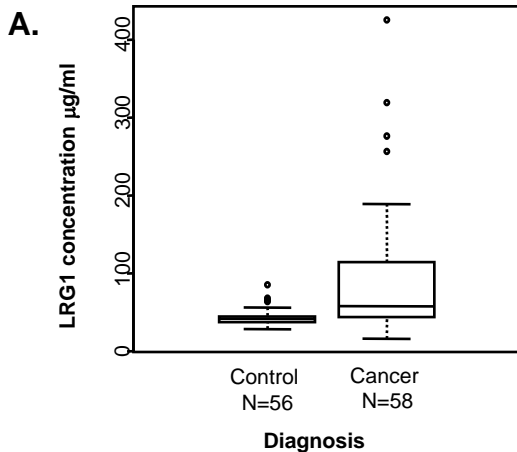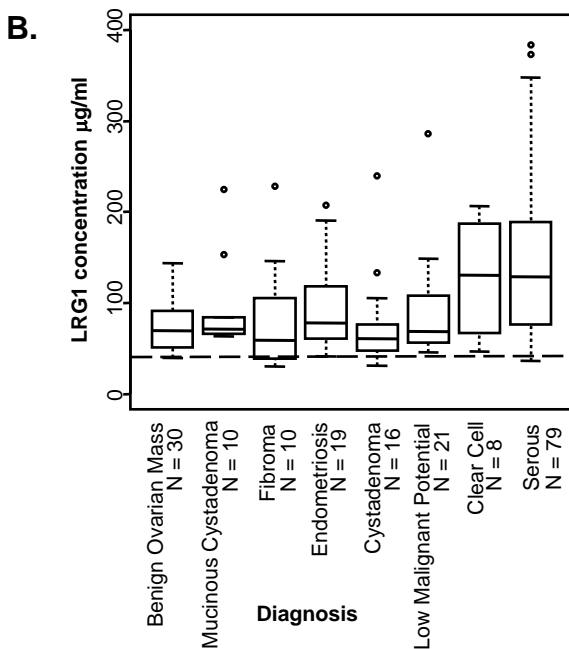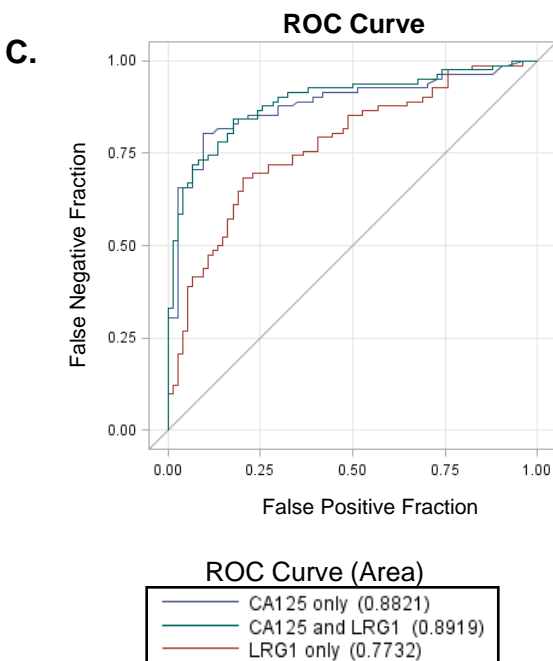

Supplement: MOESM1 [file 9664790]
